# Supplementary material
Source: PubMed Central journal article supplement (PMC5815026)
Supplement: jamacardiol-2-664-s001.pdf [file jamacardiol-2-664-s001.pdf]

## Supplementary Online Content

Hayward RM, Foster E, Tseng ZH. Maternal and fetal outcomes of admission for delivery in women with congenital heart disease. *JAMA Cardiol*. Published online April 12, 2017. doi:10.1001/jamacardio.2017.0283

**eTable 1.** Inclusion and Exclusion Criteria

**eTable 2.** CHD Diagnoses With Corresponding ICD-9 Codes

**eTable 3.** Outcomes

**eTable 4.** Medical Comorbidities

**eTable 5.** Type of CHD

This supplementary material has been provided by the authors to give readers additional information about their work.

eTable 1. Inclusion and Exclusion Criteria

| Inclusion Criteria                                              | ICD-9 Codes | ICD-9 Procedure Codes                                                                    | DRG Codes                    |
|-----------------------------------------------------------------|-------------|------------------------------------------------------------------------------------------|------------------------------|
| Delivery Admission*                                             | V27, 650    | 72[0-1], 7221, 7229, 7231, 7239, 724, 72[5-9], 7322, 7359, 736, 740, 741, 742, 744, 7499 | 370, 371, 372, 373, 374, 375 |
| Cesarean Section                                                | 669.71      | 74.0X, 74.1X, 74.2X, 74.4X                                                               |                              |
| Exclusion Criteria                                              |             |                                                                                          |                              |
| Ectopic and Molar Pregnancy                                     | 63X         |                                                                                          |                              |
| Dilation and Curettage or Intra-amniotic injection for abortion |             | 69.01, 69.51, 74.91, 75.0                                                                |                              |

X is any number 0-9.

\*From Kuklina EV et al. An enhanced method for identifying obstetric deliveries: implications for estimating maternal morbidity. *Matern Child Health J.* 2008.

eTable 2. CHD Diagnoses With Corresponding ICD-9 Codes

| Complex Congenital Heart Defects            | ICD-9 Codes |
|---------------------------------------------|-------------|
| Endocardial Cushion Defects                 | 745.6       |
| Hypoplastic Left Heart Syndrome             | 746.7       |
| Tetralogy of Fallot                         | 745.2       |
| Transposition of the Great Arteries         | 745.1       |
| Truncus Arteriosus                          | 745         |
| Univentricular Heart                        | 745.3       |
| <b>Non-Complex Congenital Heart Defects</b> |             |
| Atrial Septal Defect                        | 745.5       |
| Ventricular Septal Defect                   | 745.4       |
| Patent Ductus Arteriosus                    | 747         |
| Aortic Coarctation                          | 747.1       |
| Ebstein's Anomaly                           | 746.2       |
| Unspecified Defect of Septal Closure        | 745.9       |
| Anomalies of the Pulmonary Artery           | 747.3       |
| Anomalies of the Pulmonary Valve            | 746         |
| Anomalies of the Tricuspid Valve            | 746.1       |
| Congenital Aortic Stenosis                  | 746.3       |
| Congenital Aortic Insufficiency             | 746.4       |
| Congenital Mitral Stenosis                  | 746.5       |
| Congenital Mitral Insufficiency             | 746.6       |
| Anomalies of the Great Veins                | 747.4       |
| Other Specified Anomalies of the Heart*     | 746.8       |

\* Includes subaortic stenosis, cor triatriatum, infundibular pulmonic stenosis, Shone's syndrome, Uhl anomaly, coronary anomalies, congenital heart block, dextrocardia, and other.

eTable 3. Outcomes

|                                                     | ICD-9 Codes                                                         |
|-----------------------------------------------------|---------------------------------------------------------------------|
| Preeclampsia or Eclampsia                           | 624.4, 624.5, 624.6, 624.7                                          |
| Preterm Labor                                       | 644.0, 644.2                                                        |
| Anemia Complicating Pregnancy                       | 648.2, 280-5                                                        |
| Placental Abnormalities (previa, abruptio, accreta) | 641.0-2, 667                                                        |
| Infection During Labor                              | 658.2, 658.4, 659.2, 659.3                                          |
| Fetal Growth Restriction                            | 656.5                                                               |
| Fetal Distress                                      | 656.3, 656.8, 659.7                                                 |
| Fetal Death                                         | 656.4                                                               |
| AF, AFL or SVT                                      | 427.0, 427.31, 427.32                                               |
| Incident VT, VF or SCA                              | 427.1, 427.4, 427.41, 427.42, 427.5, V12.53, 674.90, 674.92, 674.94 |
| Congestive Heart Failure                            | 402.01, 402.11, 402.91, 404.91, 404.93, 428, 425, 674.5             |

From Bansil P, Kuklina EV, Meikle SF, et al. Maternal and fetal outcomes among women with depression. *J Womens Health (Larchmt)* 2010;19:329-34.

eTable 4. Medical Comorbidities

| Comorbidity                | ICD-9 Codes                                                                    |
|----------------------------|--------------------------------------------------------------------------------|
| Coronary Artery Disease    | 36.0X, 36.1X, 410.X, 411.0, 411.1, 411.8, 411.89, 412, 413.X, 414.X, V45.81-82 |
| Congestive Heart Failure   | 402.01, 402.11, 402.91, 404.91, 404.93, 425.X, 428.X                           |
| Cerebrovascular Disease    | 430, 431, 432.X, 433.X, 434.X, 435.X, 438.X                                    |
| Chronic Kidney Disease     | 585.X, V42.0, V45.1X, V56.X                                                    |
| Pulmonary Disease          | 491.2X, 491.8, 491.9, 492.X, 493.X, 494.X, 496                                 |
| Hypertension               | 401.X, 402.X, 403.X, 404.X, 405.X, 437.2                                       |
| Diabetes Mellitus          | 249.X, 250.X, 791.5, V45.85, V53.91, V65.46                                    |
| Cardiac Valvular Disease   | 394.X, 395.X, 396.X, 397.0, 397.1, 424.0, 424.1, 424.2, 424.3, V42.2, V43.3    |
| Depression                 | 296.2, 296.3, 298.0, 300.4, 309.0, 309.1, 311                                  |
| Alcohol or Substance Abuse | 291, 292, 303, 304, 205, 648.3, 655.5, 965.0, V65.42                           |

\* X designates all diagnosis codes under the listed category, e.g., 398.X includes 398, 398.0, 398.9, 398.91, and 398.99

eTable 5. Type of CHD

| Type of CHD                          | No. of Patients <sup>a</sup> |                   |                  |
|--------------------------------------|------------------------------|-------------------|------------------|
|                                      | Vaginal Delivery             | Cesarean Delivery | Total            |
| Complex                              | 141                          | 121               | 262              |
| Tetralogy of Fallot                  | 46                           | 56                | 102              |
| Transposition complex                | 57                           | 43                | 100              |
| Endocardial cushion defect           | 11                           | <10 <sup>b</sup>  | <20              |
| Univentricular heart                 | <10 <sup>b</sup>             | <10 <sup>b</sup>  | <10 <sup>b</sup> |
| Truncus arteriosus                   | 18                           | <10 <sup>b</sup>  | <10 <sup>b</sup> |
| Hypoplastic left heart syndrome      | <10 <sup>b</sup>             | <10 <sup>b</sup>  | <10 <sup>b</sup> |
| Noncomplex                           | 1953                         | 1236              | 3189             |
| Atrial septal defect                 | 672                          | 390               | 1062             |
| Ventricular septal defect            | 365                          | 222               | 587              |
| Patent ductus arteriosus             | 92                           | 60                | 152              |
| Aortic coarctation                   | 71                           | 48                | 119              |
| Ebstein anomaly                      | 37                           | 22                | 59               |
| Unspecified defect of septal closure | 16                           | 10                | 26               |
| Anomalies of the pulmonary artery    | 110                          | 68                | 178              |
| Anomalies of the pulmonary valve     | 172                          | 112               | 284              |
| Congenital tricuspid valve disease   | 13                           | 12                | 25               |
| Congenital aortic stenosis           | 46                           | 30                | 76               |
| Congenital aortic insufficiency      | 219                          | 135               | 354              |
| Congenital mitral stenosis           | <10 <sup>b</sup>             | <10 <sup>b</sup>  | <10 <sup>b</sup> |
| Congenital mitral insufficiency      | 32                           | 13                | 45               |
| Anomalies of great veins             | 31                           | 24                | 55               |
| Other specified cardiac anomalies    | 386                          | 271               | 657              |

Abbreviation: CHD, congenital heart disease.

<sup>a</sup>Some patients have multiple CHD defects classified.

<sup>b</sup>Health Care Cost and Utilization Project policy prohibits reporting cell frequencies of less than 10.
